# Supplementary material for: Effects of 4-Hexylresorcinol on Craniofacial Growth in Rats
Source: MDPI journal article supplement (doi:10.3390/ijms22168935), 2021-08-19

# Effects of 4-Hexylresorcinol on Craniofacial Growth in Rats

In-Song Lee <sup>1</sup>, Dae-Won Kim <sup>2</sup>, Ji-Hyeon Oh <sup>3</sup>, Suk Keun Lee <sup>4</sup>, Je-Yong Choi <sup>5</sup>, Seong-Gon Kim <sup>3,\*</sup> and Tae-Woo Kim <sup>1,\*</sup>

<sup>1</sup> Department of Orthodontics, School of Dentistry, Seoul National University, Seoul 3080, Korea; insong.lee@gmail.com (I.-S.L.)

<sup>2</sup> Department of Oral Biochemistry, College of Dentistry, Gangneung-Wonju National University, Gangneung 28644, Korea; kimdw@gwnu.ac.kr

<sup>3</sup> Department of Oral and Maxillofacial Surgery, College of Dentistry, Gangneung-Wonju National University, Gangneung 28644, Korea; haruna348@naver.com (J.-H.O.)

<sup>4</sup> Institution of Hydrogen Magnetic Reaction Gene Regulation, Daejeon 34140, Korea; sukkeunlee@hanmail.net

<sup>5</sup> Department of Biochemistry and Cell Biology, Cell and Matrix Research Institute, Korea Mouse Phenotyping Center (KMPC), School of Medicine, Kyungpook National University, Daegu 41944, Korea; jechoi@knu.ac.kr

\* Correspondence: kimgsg@gwnu.ac.kr (S.-G.K.); taewoo@snu.ac.kr (T.-W.K.); Tel.: +82-33-640-2468 (S.-G.K.); +82-2-2072-2678 (T.-W.K.)

### Supplementary Figure 1. Extracellular oxygen consumption assay.

The administration of 4-hexylresorcinol (4HR) decreased extracellular oxygen consumption in Saos-2 cells. The relative oxygen consumption level compared to untreated control was  $97.1 \pm 1.8$ ,  $96.7 \pm 1.5$ , and  $95.4 \pm 1.7$  % for 1, 10, and 100  $\mu\text{M}$ , respectively. Accordingly, 100  $\mu\text{M}$  4HR administration decreased 4.6% of oxygen consumption in Saos-2 cells ( $p < 0.05$ ).

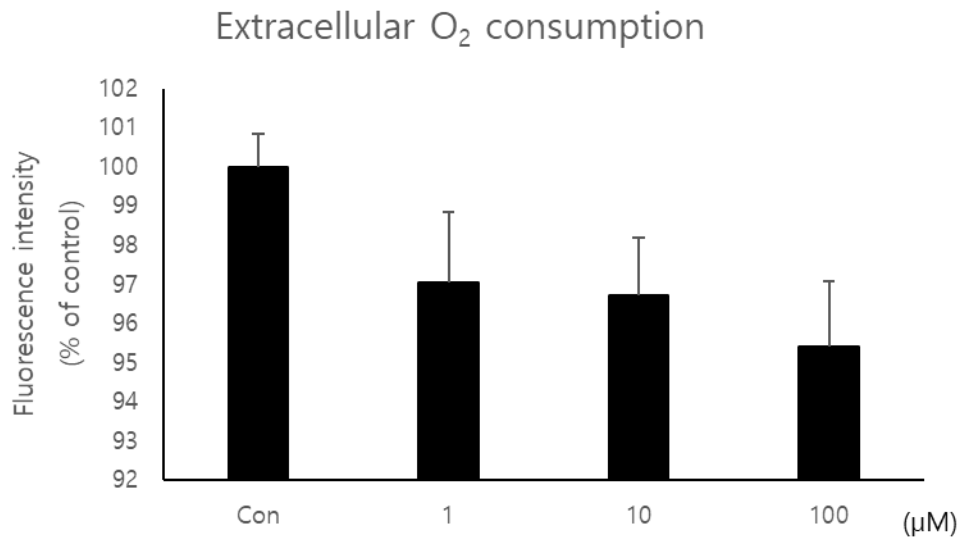

### Supplementary Figure 2. ATP level assay.

The administration of 4-hexylresorcinol (4HR) decreased ATP level in Saos-2 cells. The ATP level was  $54350.5 \pm 4826.5$ ,  $53766.5 \pm 4696.5$ ,  $51653.0 \pm 3286.0$  and  $47338.5 \pm 5362.5$  RLU for untreated control, 1, 10, and 100  $\mu\text{M}$  at 24 h after treatment, respectively.

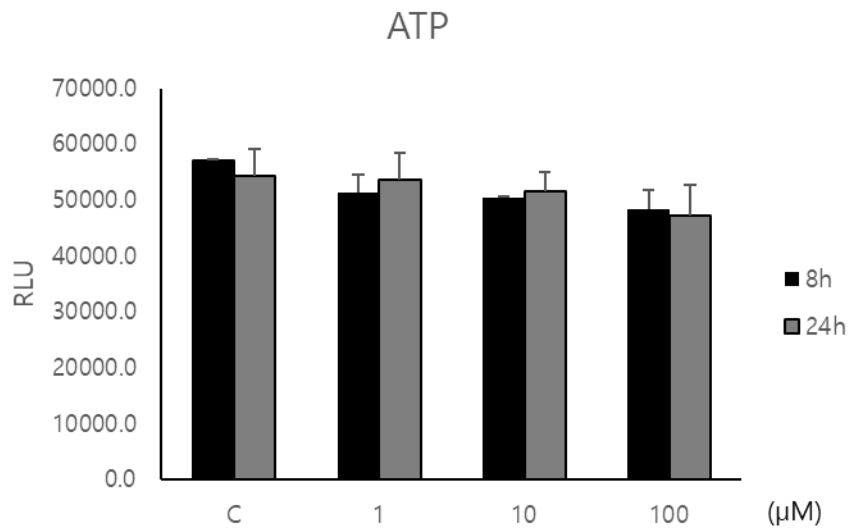

### Supplementary Figure 3. Mitochondrial membrane potential assay.

The administration of 4-hexylresorcinol (4HR) increased MMP in Saos-2 cells. The relative MMP level was  $103.0 \pm 5.22$ ,  $108.9 \pm 2.31$ , and  $109.1 \pm 2.9$  % for 1, 10, and 100  $\mu\text{M}$  at 24 h after treatment, respectively. Accordingly, 10 and 100  $\mu\text{M}$  4HR administration increased MMP significantly in Saos-2 cells ( $p < 0.05$ ).

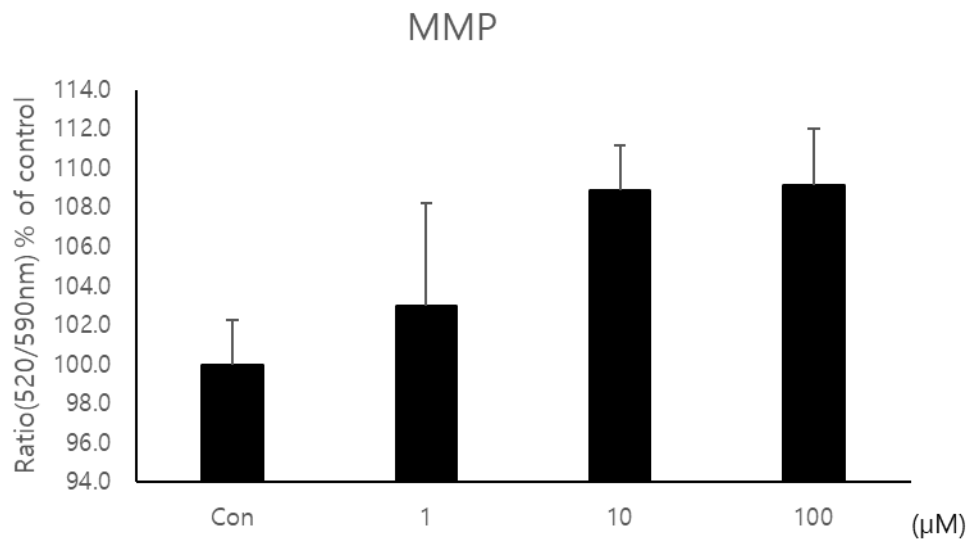

#### Supplementary Figure 4. Cytochrome c assay for cytoplasmic and mitochondrial fraction.

As demonstrated by Western blot analysis using cytochrome c apoptosis ICC antibody kit (Abcam, CAT#: ab110417), the administration of 4HR decreased cytochrome c levels at 100  $\mu$ M, but not other concentrations in the mitochondrial fraction. Interestingly, 1 and 10  $\mu$ M 4HR administration slightly increased cytochrome c level of mitochondria without statistical significance ( $p > 0.05$ ). The decreased cytochrome c at 100  $\mu$ M of 4HR was not detected in the cytoplasmic fraction.

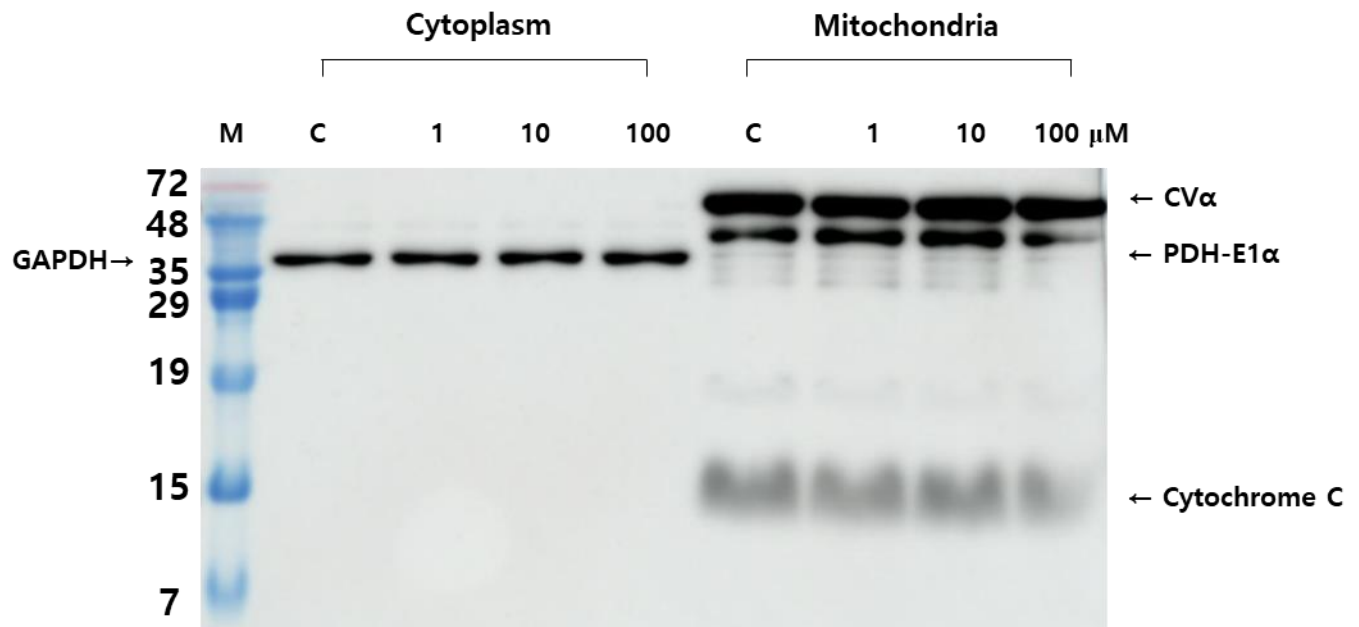

Supplement: s1 [file s1]
